# Supplementary material
Source: MDPI journal article supplement (https://www.mdpi.com/2071-1050/9/6/922)
Supplement: s1 [file s1]

Calculation process of elevators energy consumption

The new calculation method of elevators energy consumption is adopt, presented by Al-Sharif [[[1]](#footnote-1)], as shown in the following.

|  |  | (1) |
| --- | --- | --- |

Where *E* is the daily energy consumed in kWh/day, *R* is the nominal power in kW, *ST* is the number of starts per day, *TP* refers to the typical trip time, depends on the number of floors, the type of drive and consequently the rated speed. In our calculation, the mean value of *TP* (5 seconds) is used. The difficulty with the parameter *ST* is that it has to be estimated or measured, thus affecting the final accuracy of the estimate. A simple method of estimating the number of starts per day, is to assume two peaks of two hours each, during which the maximum value of 240 starts per hour is achieved, and assume another eight hours of normal activity, producing 60 starts per hour, and the remaining 12 hours of off peak activity, producing 20 starts per hour. This gives a total number of starts per day of :

starts per day

Then the total energy consumption per day of the elevator will be:

Therefore, the energy consumed by the elevators is

1. Al-Sharif L. Lift and Escalator Energy Consumption[A]. Proceedings of the CIBSE/ASHRAE Joint National Conference [C]. Harrogate, UK, 1996, 231-239. [↑](#footnote-ref-1)
